# Supplementary material
Source: MDPI journal article supplement (https://www.mdpi.com/2075-5309/13/6/1518)
Supplement: s1 [file s1]

SUP Table S1. Statistical analysis of temperature, relative humidity and absolute humidity for the control, gold and Passivhaus homes. Source: Authors.

| House      | Parameter                |                      | Winter  |         |             | Spring  |         |             | Summer  |         |             | All     |         |             |
|------------|--------------------------|----------------------|---------|---------|-------------|---------|---------|-------------|---------|---------|-------------|---------|---------|-------------|
|            |                          | Statistical analysis | Bedroom | Kitchen | Living room |
| Control    | Temp (°C)                | Min                  | 16.0    | 16.1    | 16.2        | 13.2    | 16.8    | 15.6        | 18.0    | 18.4    | 18.3        | 13.2    | 16.1    | 15.6        |
|            |                          | Max                  | 23.2    | 26.0    | 33.4        | 26.8    | 26.5    | 33.5        | 26.2    | 27.1    | 32.7        | 26.8    | 27.1    | 33.5        |
|            |                          | Mean                 | 20.3    | 21.6    | 24.7        | 21.4    | 21.8    | 24.7        | 22.4    | 22.5    | 26.3        | 21.7    | 22.0    | 25.3        |
|            |                          | SD                   | 1.4     | 1.9     | 2.5         | 1.4     | 1.6     | 2.8         | 1.3     | 1.3     | 2.2         | 1.5     | 1.6     | 2.6         |
|            | Relative humidity (%RH)  | Min                  | 42.7    | 33.0    | 27.3        | 37.6    | 33.0    | 24.7        | 44.5    | 40.1    | 32.1        | 37.6    | 33.0    | 24.7        |
|            |                          | Max                  | 60.5    | 61.1    | 55.2        | 64.3    | 65.1    | 63.8        | 71.0    | 73.1    | 60.0        | 71.0    | 73.1    | 63.8        |
|            |                          | Mean                 | 51.8    | 46.5    | 43.0        | 49.9    | 46.5    | 42.8        | 55.2    | 54.1    | 47.0        | 52.3    | 49.4    | 44.5        |
|            |                          | SD                   | 2.8     | 3.9     | 3.7         | 3.5     | 4.3     | 6.5         | 3.5     | 3.9     | 4.4         | 4.2     | 5.5     | 5.8         |
|            | Absolute Humidity (g/kg) | Min                  | 6.6     | 5.7     | 6.2         | 5.9     | 5.6     | 6.3         | 8.5     | 8.0     | 8.4         | 5.9     | 5.6     | 6.2         |
|            |                          | Max                  | 11.6    | 13.2    | 13.9        | 13.9    | 14.2    | 14.8        | 15.4    | 17.1    | 16.4        | 15.4    | 17.1    | 16.4        |
|            |                          | Mean                 | 9.2     | 8.9     | 9.8         | 9.4     | 9.0     | 9.7         | 11.0    | 10.8    | 11.7        | 10.0    | 9.7     | 10.5        |
|            |                          | SD                   | 1.0     | 1.3     | 1.3         | 1.2     | 1.4     | 1.3         | 1.2     | 1.1     | 1.2         | 1.4     | 1.6     | 1.6         |
| Gold       | Temp (°C)                | Min                  | 17.4    | 9.3     | 15.8        | 16.0    | 11.4    | 16.0        | 18.8    | 14.3    | 18.4        | 16.0    | 9.3     | 15.8        |
|            |                          | Max                  | 22.8    | 24.4    | 19.8        | 24.8    | 27.1    | 21.9        | 24.6    | 27.4    | 22.2        | 24.8    | 27.4    | 22.2        |
|            |                          | Mean                 | 21.3    | 19.9    | 18.1        | 21.3    | 20.3    | 18.9        | 21.8    | 21.4    | 20.1        | 21.5    | 20.7    | 19.3        |
|            |                          | SD                   | 0.8     | 2.4     | 0.7         | 1.1     | 2.4     | 0.9         | 0.8     | 2.4     | 0.6         | 1.0     | 2.5     | 1.0         |
|            | Relative humidity (%RH)  | Min                  | 38.0    | 34.3    | 41.6        | 35.4    | 27.7    | 37.0        | 40.9    | 37.3    | 44.9        | 35.4    | 27.7    | 37.0        |
|            |                          | Max                  | 52.5    | 58.9    | 61.1        | 61.1    | 69.8    | 67.0        | 64.8    | 70.7    | 68.3        | 64.8    | 70.7    | 68.3        |
|            |                          | Mean                 | 45.0    | 45.7    | 51.5        | 45.5    | 46.9    | 50.8        | 53.4    | 54.4    | 57.7        | 48.5    | 49.7    | 53.6        |
|            |                          | SD                   | 2.5     | 2.9     | 3.3         | 4.4     | 5.7     | 4.7         | 3.2     | 5.6     | 3.4         | 5.4     | 6.6     | 5.2         |
|            | Absolute Humidity (g/kg) | Min                  | 6.3     | 4.3     | 6.1         | 5.9     | 4.2     | 5.9         | 7.0     | 6.8     | 7.4         | 5.9     | 4.2     | 5.9         |
|            |                          | Max                  | 10.5    | 11.9    | 10.2        | 13.0    | 13.5    | 12.5        | 13.0    | 14.1    | 12.5        | 13.0    | 14.1    | 12.5        |
|            |                          | Mean                 | 8.4     | 7.9     | 8.0         | 8.5     | 8.3     | 8.3         | 10.3    | 10.2    | 10.0        | 9.2     | 9.0     | 8.9         |
|            |                          | SD                   | 0.7     | 1.2     | 0.7         | 1.1     | 1.5     | 1.1         | 0.9     | 1.2     | 0.8         | 1.3     | 1.6     | 1.3         |
| Passivhaus | Temp (°C)                | Min                  | 18.1    | 19.8    | 17.9        | 18.2    | 19.3    | 17.6        | 17.7    | 22.6    | 19.3        | 17.7    | 19.3    | 17.6        |
|            |                          | Max                  | 25.8    | 28.3    | 25.0        | 28.6    | 29.1    | 27.5        | 26.7    | 28.3    | 26.1        | 28.6    | 29.1    | 27.5        |
|            |                          | Mean                 | 22.1    | 23.2    | 21.0        | 22.4    | 23.5    | 21.5        | 22.1    | 25.2    | 22.7        | 22.2    | 24.1    | 21.9        |
|            |                          | SD                   | 1.1     | 1.3     | 1.2         | 1.5     | 1.5     | 1.4         | 1.4     | 1.0     | 1.3         | 1.4     | 1.6     | 1.5         |
|            | Relative humidity (%RH)  | Min                  | 33.4    | 33.7    | 36.4        | 30.7    | 28.9    | 33.0        | 38.8    | 38.0    | 43.4        | 30.7    | 28.9    | 33.0        |
|            |                          | Max                  | 54.6    | 58.7    | 62.6        | 63.6    | 62.8    | 65.7        | 68.8    | 63.6    | 67.4        | 68.8    | 63.6    | 67.4        |
|            |                          | Mean                 | 41.9    | 40.5    | 43.6        | 42.9    | 41.3    | 44.6        | 52.9    | 46.1    | 52.9        | 46.7    | 43.1    | 47.7        |
|            |                          | SD                   | 3.2     | 3.4     | 3.8         | 5.1     | 3.9     | 4.8         | 4.0     | 3.2     | 3.3         | 6.7     | 4.4     | 5.9         |
|            | Absolute Humidity (g/kg) | Min                  | 6.6     | 6.4     | 6.1         | 6.1     | 5.3     | 5.7         | 7.3     | 8.3     | 8.3         | 6.1     | 5.3     | 5.7         |
|            |                          | Max                  | 9.9     | 14.9    | 12.1        | 14.4    | 16.4    | 16.1        | 14.1    | 16.4    | 15.7        | 14.4    | 16.4    | 16.1        |
|            |                          | Mean                 | 8.2     | 8.4     | 8.0         | 8.6     | 8.8     | 8.5         | 10.3    | 10.8    | 10.7        | 9.2     | 9.5     | 9.3         |
|            |                          | SD                   | 0.7     | 1.1     | 0.9         | 1.2     | 1.4     | 1.4         | 1.1     | 1.2     | 1.1         | 1.4     | 1.6     | 1.7         |

*SUP Table S2. Statistical analysis of IAQ perceptions for summer in the three homes. Source: Authors.*

| IAQ perceptions                       | House | Participant | Result | Mean | SD   | Mean + SD | Mean -SD | Max | Min |
|---------------------------------------|-------|-------------|--------|------|------|-----------|----------|-----|-----|
| Fresh (1) – Stuffy (7)                | SC-CO | A           | 4      | 4.67 | 0.58 | 5.24      | 4.09     | 5   | 4   |
|                                       |       | B           | 5      |      |      |           |          |     |     |
|                                       |       | C           | 5      |      |      |           |          |     |     |
|                                       | SC-GD | A           | 1      | 2    | 1.41 | 3.41      | 0.59     | 3   | 1   |
|                                       |       | B           | 3      |      |      |           |          |     |     |
|                                       |       | C           | --     |      |      |           |          |     |     |
|                                       | SC-PH | A           | 2      | 2    | 0    | 2         | 2        | 2   | 2   |
|                                       |       | B           | 2      |      |      |           |          |     |     |
|                                       |       | C           | 2      |      |      |           |          |     |     |
| Dry (1) – humid (7)                   | SC-CO | A           | 4      | 4.67 | 0.58 | 5.24      | 4.09     | 5   | 4   |
|                                       |       | B           | 5      |      |      |           |          |     |     |
|                                       |       | C           | 5      |      |      |           |          |     |     |
|                                       | SC-GD | A           | 2      | 2    | 0    | 2         | 2        | 2   | 2   |
|                                       |       | B           | 2      |      |      |           |          |     |     |
|                                       |       | C           | --     |      |      |           |          |     |     |
|                                       | SC-PH | A           | 6      | 5.33 | 0.58 | 5.91      | 4.76     | 6   | 5   |
|                                       |       | B           | 5      |      |      |           |          |     |     |
|                                       |       | C           | 5      |      |      |           |          |     |     |
| Still (1) – draughty (7)              | SC-CO | A           | 5      | 5.33 | 0.58 | 5.91      | 4.76     | 6   | 5   |
|                                       |       | B           | 5      |      |      |           |          |     |     |
|                                       |       | C           | 6      |      |      |           |          |     |     |
|                                       | SC-GD | A           | 2      | 2    | 0    | 2         | 2        | 2   | 2   |
|                                       |       | B           | 2      |      |      |           |          |     |     |
|                                       |       | C           | --     |      |      |           |          |     |     |
|                                       | SC-PH | A           | 4      | 4    | 0    | 4         | 4        | 4   | 4   |
|                                       |       | B           | 4      |      |      |           |          |     |     |
|                                       |       | C           | 4      |      |      |           |          |     |     |
| Odourless (1) – smelly (7)            | SC-CO | A           | 4      | 4    | 0    | 4         | 4        | 4   | 4   |
|                                       |       | B           | 4      |      |      |           |          |     |     |
|                                       |       | C           | 4      |      |      |           |          |     |     |
|                                       | SC-GD | A           | 2      | 2.5  | 0.71 | 3.21      | 1.79     | 3   | 2   |
|                                       |       | B           | 3      |      |      |           |          |     |     |
|                                       |       | C           | --     |      |      |           |          |     |     |
|                                       | SC-PH | A           | 1      | 1.67 | 0.58 | 2.24      | 1.09     | 2   | 1   |
|                                       |       | B           | 2      |      |      |           |          |     |     |
|                                       |       | C           | 2      |      |      |           |          |     |     |
| Satisfactory (1) – unsatisfactory (7) | SC-CO | A           | 2      | 2.67 | 0.58 | 3.24      | 2.09     | 3   | 2   |
|                                       |       | B           | 3      |      |      |           |          |     |     |
|                                       |       | C           | 3      |      |      |           |          |     |     |
|                                       | SC-GD | A           | 2      | 2.5  | 0.71 | 3.21      | 1.79     | 3   | 2   |
|                                       |       | B           | 3      |      |      |           |          |     |     |
|                                       |       | C           | --     |      |      |           |          |     |     |
|                                       | SC-PH | A           | 1      | 1    | 0    | 1         | 1        | 1   | 1   |
|                                       |       | B           | 1      |      |      |           |          |     |     |
|                                       |       | C           | 1      |      |      |           |          |     |     |

*SUP Table S3. Statistical analysis of IAQ perceptions for winter in the three homes. Source: Authors.*

| IAQ perceptions                       | House | Participant | Result | Mean | SD   | Mean + SD | Mean -SD | Max | Min |
|---------------------------------------|-------|-------------|--------|------|------|-----------|----------|-----|-----|
| Fresh (1) – Stuffy (7)                | SC-CO | A           | 4      | 5    | 1    | 6         | 4        | 6   | 4   |
|                                       |       | B           | 5      |      |      |           |          |     |     |
|                                       |       | C           | 6      |      |      |           |          |     |     |
|                                       | SC-GD | A           | 1      | 2    | 1.41 | 3.41      | 0.59     | 3   | 1   |
|                                       |       | B           | 3      |      |      |           |          |     |     |
|                                       |       | C           |        |      |      |           |          |     |     |
|                                       | SC-PH | A           | 2      | 1.67 | 0.58 | 2.24      | 1.09     | 2   | 1   |
|                                       |       | B           | 1      |      |      |           |          |     |     |
|                                       |       | C           | 2      |      |      |           |          |     |     |
| Dry (1) – humid (7)                   | SC-CO | A           | 4      | 4.67 | 0.58 | 5.24      | 4.09     | 5   | 4   |
|                                       |       | B           | 5      |      |      |           |          |     |     |
|                                       |       | C           | 5      |      |      |           |          |     |     |
|                                       | SC-GD | A           | 2      | 2    | 0    | 2         | 2        | 2   | 2   |
|                                       |       | B           | 2      |      |      |           |          |     |     |
|                                       |       | C           | --     |      |      |           |          |     |     |
|                                       | SC-PH | A           | 6      | 5.33 | 0.58 | 5.91      | 4.76     | 6   | 5   |
|                                       |       | B           | 5      |      |      |           |          |     |     |
|                                       |       | C           | 5      |      |      |           |          |     |     |
| Still (1) – draughty (7)              | SC-CO | A           | 5      | 5.33 | 0.58 | 5.91      | 4.76     | 6   | 5   |
|                                       |       | B           | 5      |      |      |           |          |     |     |
|                                       |       | C           | 6      |      |      |           |          |     |     |
|                                       | SC-GD | A           | 2      | 2    | 0    | 2         | 2        | 2   | 2   |
|                                       |       | B           | 2      |      |      |           |          |     |     |
|                                       |       | C           | --     |      |      |           |          |     |     |
|                                       | SC-PH | A           | 4      | 4    | 0    | 4         | 4        | 4   | 4   |
|                                       |       | B           | 4      |      |      |           |          |     |     |
|                                       |       | C           | 4      |      |      |           |          |     |     |
| Odourless (1) – smelly (7)            | SC-CO | A           | 4      | 4    | 0    | 4         | 4        | 4   | 4   |
|                                       |       | B           | 4      |      |      |           |          |     |     |
|                                       |       | C           | 4      |      |      |           |          |     |     |
|                                       | SC-GD | A           | 2      | 2.5  | 0.71 | 3.21      | 1.79     | 3   | 2   |
|                                       |       | B           | 3      |      |      |           |          |     |     |
|                                       |       | C           | --     |      |      |           |          |     |     |
|                                       | SC-PH | A           | 1      | 1.67 | 0.58 | 2.24      | 1.09     | 2   | 1   |
|                                       |       | B           | 2      |      |      |           |          |     |     |
|                                       |       | C           | 2      |      |      |           |          |     |     |
| Satisfactory (1) – unsatisfactory (7) | SC-CO | A           | 2      | 3    | 1    | 4         | 2        | 4   | 2   |
|                                       |       | B           | 3      |      |      |           |          |     |     |
|                                       |       | C           | 4      |      |      |           |          |     |     |
|                                       | SC-GD | A           | 2      | 2.5  | 0.71 | 3.21      | 1.79     | 3   | 2   |
|                                       |       | B           | 3      |      |      |           |          |     |     |
|                                       |       | C           | --     |      |      |           |          |     |     |
|                                       | SC-PH | A           | 1      | 1    | 0    | 1         | 1        | 1   | 1   |
|                                       |       | B           | 1      |      |      |           |          |     |     |
|                                       |       | C           | 1      |      |      |           |          |     |     |
